# Supplementary material for: Measuring Pleasure from Food—Validation of the Food Pleasure Scale by Multiple Techniques and Mixed Methods
Source: MDPI journal article supplement (doi:10.3390/foods13030477), 2024-02-02
Supplement: s1 [file s1]

**Table S2.** Overview of slides depicting the Food Pleasure Scale items. The slides were used in the qualitative interviews.

| Topic                    | Slide shown during interviews |
|--------------------------|-------------------------------|
| Sensory properties       |                               |
| Expectations and desires |                               |
| Collative properties     |                               |

|                                  |                                                                                                                                                                                                                                                                                                                                                                                                                                                                                                                       |
|----------------------------------|-----------------------------------------------------------------------------------------------------------------------------------------------------------------------------------------------------------------------------------------------------------------------------------------------------------------------------------------------------------------------------------------------------------------------------------------------------------------------------------------------------------------------|
| <p>Eating context</p>            |  <p>The infographic for 'Eating Context' features a green background with the title 'EATING CONTEXT' in white capital letters. It includes five circular images: a group of friends dining at a restaurant, a table set with glasses and plates, a couple sitting at a desk eating, a woman sitting on a bench eating, and a couple in a modern kitchen setting.</p>                                                                |
| <p>Product information</p>       |  <p>The infographic for 'Product Information' has an orange background with the title 'PRODUCT INFORMATION' in white capital letters. It displays various food-related graphics: a '100% NATURAL' and 'GMO free' badge, a 'Vegan' and 'GLUTEN' badge, a 'FARM FRESH ORGANIC' seal, a tomato with a 'Nutrition Facts' label, a 'CHICKEN PRODUCTION' diagram showing the process from farm to delivery, and a '100% HALAL' logo.</p> |
| <p>Post-ingestive sensations</p> |  <p>The infographic for 'Post-ingestive Sensations' features a purple background with the title 'POST-INGESTIVE SENSATIONS' in white capital letters. It includes five circular images: a person holding their stomach in discomfort, a woman celebrating with her arms raised, a man sleeping on a couch, a woman holding a mug with her eyes closed, and a man eating pizza.</p>                                                |

Figures adapted with permission from Copyright 2023 Colourbox.
