# Supplementary material for: Measuring Pleasure from Food—Validation of the Food Pleasure Scale by Multiple Techniques and Mixed Methods
Source: MDPI journal article supplement (doi:10.3390/foods13030477), 2024-02-02
Supplement: s1 [file s1]

Table S1. Overview of Food Pleasure Scale profiles of all study participants

| ID | Food Pleasure Scale profile | Most important Food Pleasure Scale items, Questionnaire, 4th quartile*                                                        |
|----|-----------------------------|-------------------------------------------------------------------------------------------------------------------------------|
| F1 |                             | Needs, Taste, Expectations, Familiarity, Texture                                                                              |
| F2 |                             | Taste, Texture, Eating w. others, Ethical values, Food variation, Pleased senses, Odor                                        |
| F3 |                             | Taste, Texture, Memories, Pleased senses, Eating w. others                                                                    |
| M1 |                             | Food variation, Novelty, Odor, Taste, Surprises, Pleased senses                                                               |
| F4 |                             | Expectations, Needs, Choices, Ethical values, Product information, Taste, Food variation, Eating w. others, Mental sensations |

**M2**

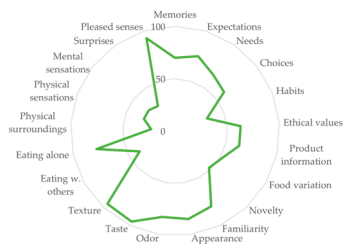

Taste, Texture, Appearance, Odor, Pleased senses

**F5**

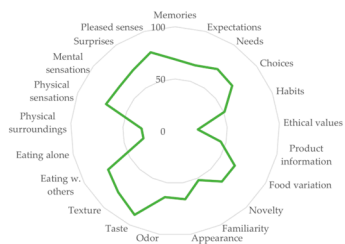

Taste, Texture, Pleased senses, Eating w. others, Needs

**F6**

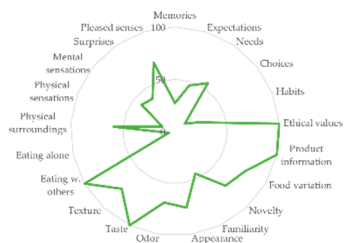

Product information, Ethical values, Taste, Eating w. others, Food variation

**F7**

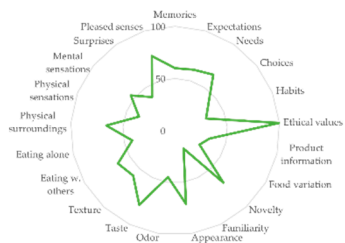

Ethical values, Taste, Pleased senses, Appearance, Novelty

**F8**

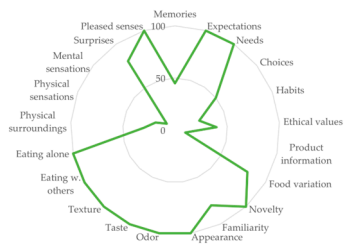

Expectations, Needs, Novelty, Taste, Eating w. others, Appearance, Odor, Texture, Eating alone, Pleased senses

**F9**

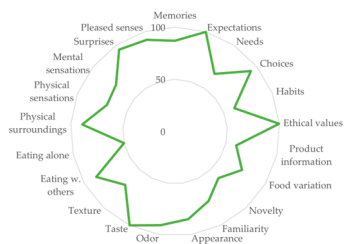

Expectations, Taste, Surprises, Ethical values

**F10**

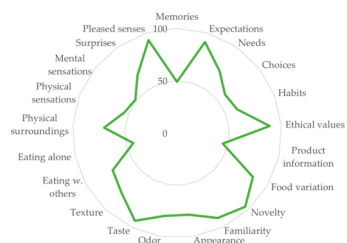

Novelty, Taste, Pleasured senses,  
Expectations, Familiarity

**F11**

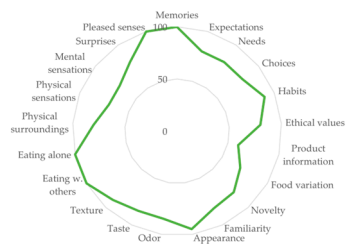

Memories, Eating w. others, Pleased  
senses, Appearance, Eating alone

**M3**

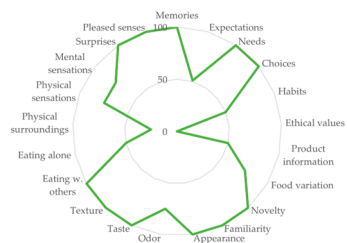

Eating w. others, Familiarity, Novelty,  
Appearance, Taste, Texture, Surprises,  
Pleased senses, Memories, Needs, Choices

**M4**

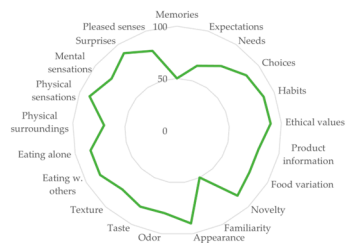

Surprises, Appearance, Physical  
sensations, Ethical values, Habits

**F12**

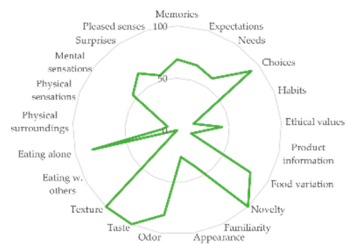

Novelty, Taste, Texture, Choices, Eating  
alone

**F13**

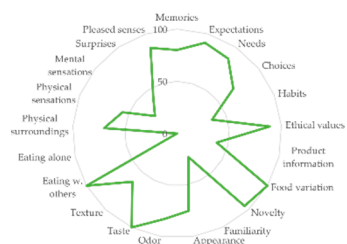

Food variation, Taste, Eating w. others,  
Novelty, Expectations

**F14**

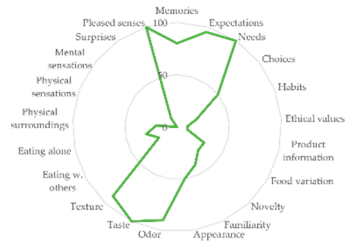

Needs, Taste, Pleasured senses, Expectations,  
Odor, Texture

**M5**

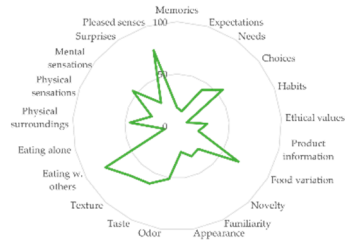

Eating w. others, Pleasured senses, Food  
variation, Texture, Taste

**F15**

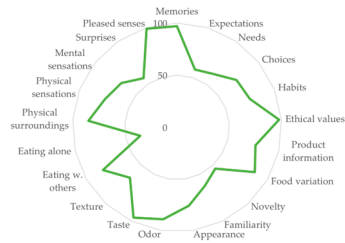

Pleasured senses, Ethical values, Memories,  
Taste, Odor

**F16**

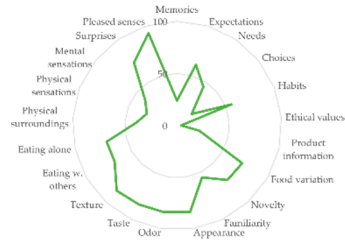

Pleasured senses, Texture, Taste, Odor,  
Appearance

**M6**

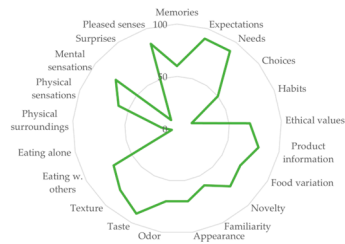

Expectations, Needs, Taste, Pleasured senses,  
Product information, Texture

\*4<sup>th</sup> Quartile: Items with the 25% highest importance ratings on the FPS Visual Analogue Scale.
